# Supplementary material for: Mussel-inspired graphene oxide nanosheet-enwrapped Ti scaffolds with drug-encapsulated gelatin microspheres for bone regeneration
Source: Royal Society of Chemistry journal article supplement (doi:10.1039/c7bm01060e), 2018-01-01
Supplement: c7bm01060e1.pdf [file c7bm01060e1.pdf]

**Supplementary data**

**Mussel-inspired graphene oxide nanosheets enwrapped Ti scaffolds with drugs  
encapsulated gelatin microspheres for bone regeneration**

Lu Han<sup>1</sup>, Honglong Sun<sup>1</sup>, Pengfei Li<sup>1</sup>, Pengfei Tang<sup>1</sup>, Chaoming Xie<sup>1</sup>, Menghao Wang<sup>1</sup>, Kefeng Wang<sup>2</sup>, Jie Weng<sup>1</sup>, Hui Tan<sup>3</sup>, Fuzeng Ren<sup>4</sup>, Xiong Lu<sup>\*1</sup>

<sup>1</sup> Key Lab of Advanced Technologies of Materials, Ministry of Education, School of Materials Science and Engineering, Southwest Jiaotong University, Chengdu 610031, Sichuan, China

<sup>2</sup> National Engineering Research Center for Biomaterials, Genome Research Center for Biomaterials, Sichuan University, Chengdu 610064, Sichuan, China

<sup>3</sup> Shenzhen Key Laboratory of Neurosurgery, The First Affiliated Hospital of Shenzhen University, Shenzhen, Guangdong 518035, China

<sup>4</sup> Department of Materials Science and Engineering, South University of Science and Technology of China, Shenzhen, Guangdong 518055, China

\* Corresponding Author

Tel.: +86-28-87634023

Fax: +86-28-87601371

Email address: luxiong\_2004@163.com

## **Fabrication of GO**

Briefly, 2 g of graphite powder was added to 46 ml of cold ( $\sim 0\text{ }^{\circ}\text{C}$ )  $\text{H}_2\text{SO}_4$  in a flask. The mixture was stirred in an ice water bath for 30 min, and then 6 g of  $\text{KMnO}_4$  was slowly added under vigorous stirring. The reaction was kept at a temperature lower than  $20\text{ }^{\circ}\text{C}$  for 2 h. Then, the ice water bath was removed, and the reaction mixture was maintained at  $35\text{ }^{\circ}\text{C}$  for 0.5 h. Subsequently, 30 ml of deionized water was gradually added into the mixture, and the reaction flask was transferred into a  $98\text{ }^{\circ}\text{C}$  water bath for 15 min. Finally, the mixture was washed with hydrochloride acid (5%) and deionized water several times to obtain GO.

## **Gelatin microspheres preparation**

A 5 g aliquot of gelatin was dissolved in 45 ml of water and added dropwise to 200 ml olive oil to create a water-in-oil emulsion. The solution was stirred at 500 rpm and chilled to  $10\text{ }^{\circ}\text{C}$  for 1.5 h; microspheres were then collected by washing with acetone, followed by vacuum filtration. They were crosslinked overnight in a glutaraldehyde solution, and the reaction was terminated by the addition of glycine (25 mg/ml) to block residual aldehyde groups. The gelatin microspheres (GelMS) were again washed in acetone and collected by filtration, lyophilized and then sieved to obtain particles.

### ***In vitro* cell culture**

Bone marrow stromal cells (BMSCs) were used to evaluate the *in vitro* behaviors of the scaffolds. Five types of scaffolds were used to culture BMSCs, namely, pure Ti scaffold, BMP2-Ti, GO/Ti, CGelMS-GO/Ti, and BMP2+Van+CGelMS-GO/Ti scaffolds. Briefly, third passage BMSCs ( $10^5$  cells/sample) were cultured with different scaffolds to investigate their biocompatibility and osteoinductivity. The morphologies of BMSCs on the different scaffolds were observed using CLSM (TCSSP5) after stained by cell Live&dead staining (A017, GeneCopoeia Inc., USA) at the third day. The proliferation of BMSCs was evaluated using a MTT assay (Sigma, USA) after 3 and 7 d of culture. The differentiation of BMSC was determined using an alkaline phosphatase (ALP) kit (Nanjing Jiancheng Bioengineering Institute, China) after 14 d of culture. There were 5 parallel samples for each scaffold.

### **Antibacterial activity test**

Four kinds of scaffolds, namely, Ti, GO/Ti, CGelMS-Ti, and BMP2+Van+CGelMS-GO/Ti scaffolds were used for the test. Briefly, 400  $\mu$ l of bacteria suspension ( $1 \times 10^6$  CFU/ml) was added onto the scaffold samples. After 4 h, 600  $\mu$ l of Luria-Bertani broth was added. Then the samples were placed in an incubator at 37 °C with constant agitation. After 1 d, 150  $\mu$ l of bacterial suspension was collected and the optical density (OD) of the suspension at 600 nm was measured using a micro plate reader (MQX200).

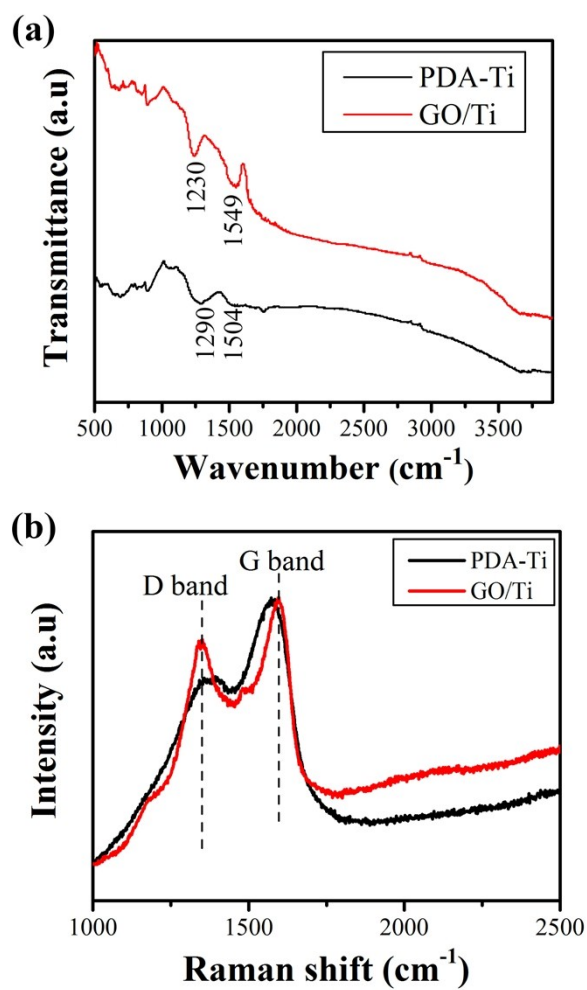

Figure S1. (a) FTIR and (b) Raman spectra of PDA-Ti and GO/Ti scaffolds.
